# Supplementary material for: Cytosolic S100A8/A9 promotes Ca2+ supply at LFA-1 adhesion clusters during neutrophil recruitment
Source: eLife journal article supplement (doi:10.7554/elife.96810), 2024-06-19
Supplement: fig4-figsupp1-data1 [file elife-96810-fig4-figsupp1-data1-v1.zip]

CaM + GAPDH - *Lyz2xGCaMP5*

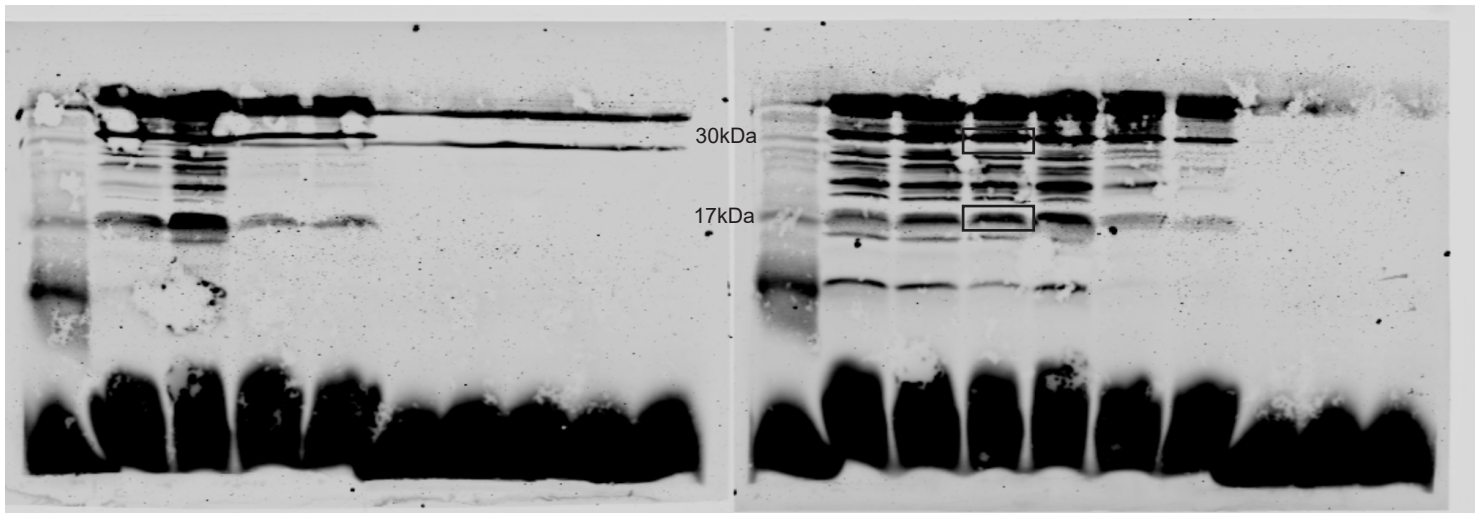

CaM + GAPDH - *Lyz2xGCaMP5xS100a9<sup>-/-</sup>*

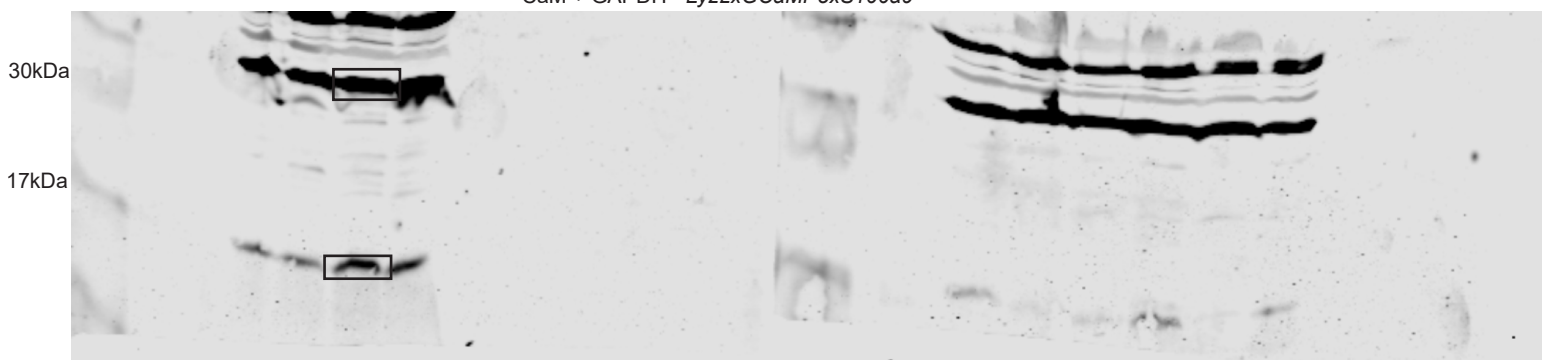

$\beta$ -Actin

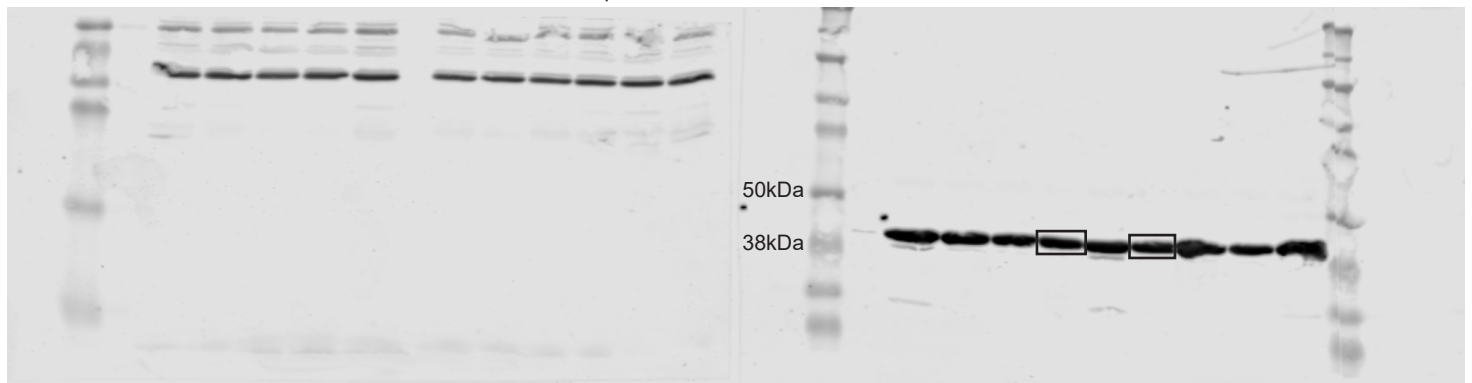

**Figure 4-figure supplement 1-source data 1.** Original Membranes corresponding to Figure 4-figure supplement 1, panel B and D. Calmodulin (CaM), GAPDH and  $\beta$ -Actin membranes are depicted and representative blots where then cropped and edited. Chamaleon Duo Pre-stained Protein Ladder was used as molecular weight marker.
